# Supplementary material for: Exploring the potential of two-dimensional bismuth–copper hybrid double perovskites for memristor applications
Source: Royal Society of Chemistry journal article supplement (doi:10.1039/d5qi00670h), 2025-01-01
Supplement: d5qi00670h1.pdf [file d5qi00670h1.pdf]

## Supporting information

# Exploring the Potential of Two-Dimensional Bismuth–Copper Hybrid Double Perovskites for Memristor Applications

Mohamed Saber Lassoued <sup>+[a]</sup>, Wang Kun<sup>+[b]</sup>, Faizan Ahmad <sup>[b]</sup>, Bai Sun\*<sup>[b]</sup> and Yan-Zhen Zheng\*<sup>[a]</sup>  
[b]

[+] contributed equally to this work

<sup>[a]</sup> Dr. Mohamed Saber Lassoued, and Prof. Yan-Zhen Zheng

*School of Chemistry, Xi'an Jiaotong University, 99 Yanxiang Road, Xi'an, Shaanxi 710054, P R. China. State Key Laboratory of Electrical Insulation and Power Equipment, Xi'an Key Laboratory of Electronic Devices and Materials Chemistry, Xi'an Jiaotong University, Xi'an 710054, China*

*E-mail: zheng.yanzhen@xjtu.edu.cn*

<sup>[b]</sup> Mr. Wang Kun, Mr. Faizan Ahmad, Prof. Bai Sun, and Prof. Yan-Zhen Zheng

*Frontiers Institute of Technology, Xi'an Jiaotong University, 99 Yanxiang Road, Xi'an, Shaanxi 710054, P R. China, Xi'an Jiaotong University, Xi'an 710054, China*

*E-mail: baisun@xjtu.edu.cn*

## CONTENTS

|                                                          |       |
|----------------------------------------------------------|-------|
| 1. General Remarks.....                                  | SI-2  |
| 2. Characterization methods and Simulation details ..... | SI-2  |
| 2.1. Characterization methods .....                      | SI-2  |
| 2.2. Simulation details .....                            | SI-3  |
| 2.3. Experimental section .....                          | SI-4  |
| 2.4. Bond length distortion .....                        | SI-5  |
| 2.4. Hirshfeld Surface Analysis .....                    | SI-5  |
| 3. Supporting Tables and Figures .....                   | SI-7  |
| 4. References .....                                      | SI-18 |

## 1. General remarks

Single-crystal X-ray diffraction (SC-XRD) data for the  $(\text{H}_2\text{MPP})_2\text{BiCuI}_8$  was collected at 298 K using a Bruker SMART APEX II CCD diffractometer equipped with graphite-monochromated Mo- $\text{K}\alpha$  radiation ( $\lambda = 0.71073 \text{ \AA}$ ) and the  $\theta$ - $\omega$  scan mode. Powder X-ray diffraction (PXRD) measurements were performed under ambient conditions (298 K) on a Rigaku D/max-III A diffractometer with Cu- $\text{K}\alpha$  radiation ( $\lambda = 1.54056 \text{ \AA}$ ). The crystalline powder samples were obtained by grinding the single crystals and scanned in the  $2\theta$  range of  $5^\circ$ – $50^\circ$  at a rate of  $10^\circ/\text{min}$ . Solid-state UV–Vis diffuse reflectance spectra were recorded on a SHIMADZU UV-3600 UV–Vis–NIR spectrophotometer, using  $\text{BaSO}_4$  powder as the reflectance standard. The current-voltage (I-V) characteristics of the devices were evaluated using an electrochemical workstation equipped with a Keysight B2900 source meter and a probe station. All density-functional theory (DFT) calculations were conducted using the CASTEP module in Materials Studio 2019.

## 2. Characterization methods and Simulation details

### 2.1. Characterization methods

#### X-ray Crystallographic Study

Single-crystal X-ray diffraction data for  $(\text{H}_2\text{MPP})_2\text{BiCuI}_8$  sample was were collected at 298 K using a Bruker SMART APEX II CCD diffractometer equipped with Mo  $\text{K}\alpha$  radiation ( $\lambda = 0.71073 \text{ \AA}$ ) and the  $\theta$ - $\omega$  scan mode. The resulting structures were solved by direct methods and refined through full-matrix least-squares procedures implemented in the SHELXTL program suite,<sup>[S1]</sup> with all non-hydrogen atoms refined anisotropically. Powder X-ray diffraction (PXRD) intensities were obtained at room temperature (298 K) using a Rigaku D/max-III A diffractometer and Cu  $\text{K}\alpha$  radiation ( $\lambda = 1.54056 \text{ \AA}$ ). Detailed crystallographic data are summarized in **Tables S1–S4**. The CCDC numbers for  $(\text{H}_2\text{MPP})_2\text{BiCuI}_8$  is 2412890. These crystallographic data are available in the Supporting Information or can be accessed free of charge through the Inorganic Crystal Structure Database via [http://www.ccdc.cam.ac.uk/data\\_request/cif](http://www.ccdc.cam.ac.uk/data_request/cif).

**Powder XRD:** The crystalline powder samples, obtained by finely grinding single-crystals, were measured at room temperature over a  $2\theta$  range of  $5^\circ$ – $50^\circ$  with a scanning rate of  $5^\circ/\text{min}$ .

**Morphological and elemental analyses** were carried out using a KYKY-EM3200 scanning electron microscope (SEM) operating at 25 kV, coupled with an Oxford X-MaxN energy-dispersive X-ray spectrometer (EDS).

**Optical measurements** were conducted by recording solid-state UV–Vis diffuse reflectance spectra of both pressed powder and film samples on a SHIMADZU UV-3600 UV–Vis–NIR spectrophotometer, with  $\text{BaSO}_4$  powder serving as the reflectance reference.

**Thermogravimetric analysis (TGA)** was performed using a METTLER TOLEDO TGA/DSC3+ Extreme instrument. Samples were heated from room temperature to 700 K at a rate of 10 K/min under a nitrogen atmosphere to assess their thermal stability.

**The current-voltage (I-V) characteristics** of the devices were evaluated using an electrochemical workstation outfitted with a Keysight B2900 source meter (Beijing, China) and a probe station from XIBI Semiconductor Technology Co., Ltd (Shanghai, China).

**2.2 Simulation Details and Computational Methods:** All simulations in this study were performed using density functional theory (DFT),<sup>[S2, S3]</sup> as implemented in the BIOVIA Materials Studio Simulation Package. We employed the generalized gradient approximation (GGA) with the Perdew–Burke–Ernzerhof (PBE) functional for the electronic structure calculations.<sup>[S4, S5]</sup> The self-consistent field convergence threshold was set to  $2 \times 10^{-6}$  eV/atom. We utilized an OTFG norm-conserving pseudopotential with an energy cutoff of 1224.50 eV. Band structure calculations and Partial DOS for  $(\text{H}_2\text{MPP})_2\text{BiCuI}_8$  were conducted without spin-orbit coupling (SOC).

## 2.3. Experimental Section

### Materials

Bismuth iodide ( $\text{BiI}_3$ ), Copper iodide ( $\text{CuI}$ ), 1-methylpiperidine-4-amine, Potassium iodide ( $\text{KI}$ ) and hydroiodic acid (55 wt % in  $\text{H}_2\text{O}$ ) were purchased by Sigma Aldrich chemicals.

#### 2.3.1. Syntheses of $(\text{H}_2\text{MPP})_2\text{BiCuI}_8$ single crystals

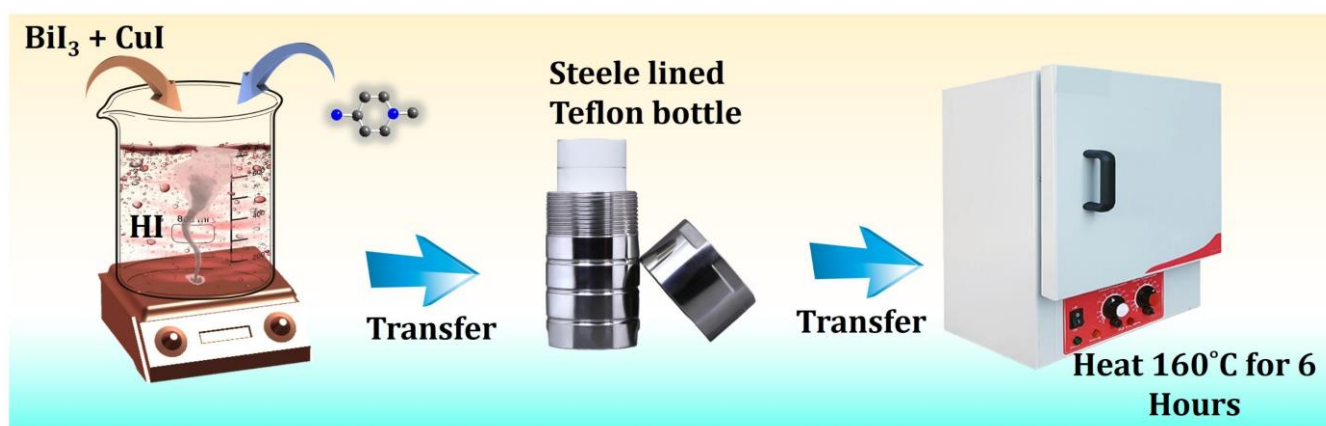

$(\text{H}_2\text{MPP})_2\text{BiCuI}_8$  was synthesized by combining  $\text{BiI}_3$  (0.5 mmol),  $\text{CuI}$  (1 mmol), 1-methylpiperidine-4-amine (2 mmol), and concentrated  $\text{HI}$  acid (5 ml) into a slurry. This mixture was heated at 160 °C for 6 hours within a PTFE-lined reaction kettle. Subsequently, single crystals of the compound were obtained through a controlled cooling process to room temperature over 24 hours. The resulting single crystals display a reddish-black opaque appearance and are plate-like in shape. These crystals were then washed with ethanol and dried under vacuum, achieving a yield of approximately 83% based on bismuth.

#### 2.3.2. Fabrication of $(\text{H}_2\text{MPP})_2\text{BiCuI}_8$ Memristor:

Crystals (0.5 g) produced via solvothermal reactions were dissolved in 1 ml of anhydrous DMF to create black solutions that exhibited no Tyndall effect. Both ITO-coated and ordinary glass slides were cleaned using detergent, followed by sequential ultrasonic bathing in deionized water, acetone, and isopropyl alcohol for 15 minutes each. Subsequently, the slides underwent ultraviolet ozone treatment for 30 minutes. The solutions were then spin-coated onto the slides at 2000 rpm for 60 seconds, accelerating at

1000 rpm/s. After spin-coating, the films were annealed on a hot plate at 70 °C for 10 minutes, during which they exhibited a noticeable color transition from light yellow to dark red. Finally, the device fabrication was completed by depositing Ag as the top electrode via magnetic sputtering using a metal mask.

## 2.4. Bond length distortion

The distortion index  $\Delta d$  of the  $[\text{BiI}_6]$  and  $[\text{CuI}_6]$  octahedra can be quantitatively calculated using the following equation:

$$\Delta d = \left(\frac{1}{n}\right) \sum_{i=1}^n \left(\frac{d_i - d}{d}\right)^2$$

where  $d$  refers the average distance of M–I (M=Bi, Cu) bonds and  $d_i$  is the individual bond length of M–I (M=Bi, Cu). The calculated distortion parameters indicate that the  $[\text{CuI}_6]$  octahedra exhibit a greater degree of distortion compared to the  $[\text{BiI}_6]$  octahedra (**Table S4**).

**2.5. Hirshfeld surface (HS) analysis** was employed to investigate the hydrogen bond interactions crucial to the nucleation and growth of crystals, specifically those involving the inorganic cores of bismuth/silver iodide units and the surrounding organic ligands (**Fig. S2**). This analysis uses parameters such as  $d_i$  and  $d_e$ —the distances from the Hirshfeld surface to the nearest internal and external atomic nuclei, respectively—to calculate a normalized contact distance ( $d_{\text{norm}}$ ), which aids in the generation of HS maps. These maps show interactions with red areas indicating non-covalent interactions shorter than the van der Waals radii, white areas representing equal distances, and blue areas for interactions longer than these radii (**Fig. S2a**). In addition to the  $d_{\text{norm}}$  map, further insights into the nature of the interactions can be obtained as well from the  $d_i$  map (**Fig. S2b**), **Shape Index** (**Fig. S2c**) and **curvedness** (**Fig. S2d**).

Significant insights were gleaned from the HS maps and two-dimensional fingerprint plots, which highlighted the prevalence of hydrogen bonds, specifically  $\text{H}\cdots\text{I}$  and  $\text{H}\cdots\text{H}$ , marked by red spots indicating their critical role in the compound's molecular architecture (**Fig. S2e**). Interestingly, hydrogen bonding

was found to be the dominant interaction, accounting for 58.6% (H $\cdots$ I) and 22.5% (H $\cdots$ H) of the crystal packing in **(H<sub>2</sub>MPP)<sub>2</sub>BiCuI<sub>8</sub>** (**Fig. S2f**).

Additionally, the analysis extended to examining bond lengths and angles within these structures to evaluate their ability to induce lattice distortions conducive to singlet excited states. Our findings indicate a greater propensity for bond length distortions within the [CuI<sub>6</sub>]<sup>2-</sup> octahedral compared to [BiI<sub>6</sub>]<sup>2-</sup> counterpart, suggesting enhanced flexibility and interactive potential. The lattice structure of **(H<sub>2</sub>MPP)<sub>2</sub>BiCuI<sub>8</sub>** showed a crystal void volume and surface area (Void volume: 295.50 Å<sup>3</sup>, Surface area: 811.37 Å<sup>2</sup>), which may contribute to its unique electronic properties and potential applications in optoelectronic devices (**Fig.S2g**).

## 1. Supporting Tables

**Table S1.** Crystal data and structure refinement for **(H<sub>2</sub>MPP)<sub>2</sub>BiCuI<sub>8</sub>**.

| Compound                          | (H <sub>2</sub> MPP) <sub>2</sub> BiCuI <sub>8</sub>                                                                                                                    |
|-----------------------------------|-------------------------------------------------------------------------------------------------------------------------------------------------------------------------|
| Empirical formula                 | C <sub>12</sub> H <sub>32</sub> Bi Cu I <sub>8</sub> N <sub>4</sub>                                                                                                     |
| Formula weight                    | 1520.15                                                                                                                                                                 |
| Crystal dimensions (mm)           | 0.10*0.20*0.18                                                                                                                                                          |
| Crystal system                    | Monoclinic                                                                                                                                                              |
| Space group                       | <i>C</i> 2                                                                                                                                                              |
| a/Å                               | 55.59 (3)                                                                                                                                                               |
| b/Å                               | 10.170 (5)                                                                                                                                                              |
| c/Å                               | 8.432 (4)                                                                                                                                                               |
| α/°                               | 90                                                                                                                                                                      |
| β/°                               | 91.801                                                                                                                                                                  |
| γ/°                               | 90                                                                                                                                                                      |
| Volume/Å <sup>3</sup>             | 4765 (4)                                                                                                                                                                |
| Z                                 | 6                                                                                                                                                                       |
| ρ calcg/cm <sup>3</sup>           | 3.179                                                                                                                                                                   |
| μ /mm-1                           | 13.54                                                                                                                                                                   |
| F(000)                            | 4008                                                                                                                                                                    |
| h, k, l max                       | 69,12,10                                                                                                                                                                |
| Data Completeness                 | 100.00%                                                                                                                                                                 |
| Data/restraints/parameters        | 3674/132/0                                                                                                                                                              |
| Goodness-of-fit on F <sup>2</sup> | 1.05                                                                                                                                                                    |
| Weight                            | w = 1/[σ <sup>2</sup> (F <sup>o</sup> <sup>2</sup> ) + (0.0483P) <sup>2</sup> + 443.3602P]<br>where P = (F <sup>o</sup> <sup>2</sup> + 2F <sub>c</sub> <sup>2</sup> )/3 |
| R-factors                         | R[F <sup>2</sup> > 2σ(F <sup>2</sup> )] = 0.056, wR(F <sup>2</sup> ) = 0.155                                                                                            |
| CCDC Number                       | 2412890                                                                                                                                                                 |

**Table S2.** Summary of selected bond lengths (Å) and bond angles (°) of (H<sub>2</sub>MPP)<sub>2</sub>BiCuI<sub>8</sub>

| Bonds                   | Length / Å | Bonds                                       | Length / Å  | Bonds                                       | Length / Å  |
|-------------------------|------------|---------------------------------------------|-------------|---------------------------------------------|-------------|
| Bi1—I11                 | 3.098 (3)  | C9—H9A                                      | 0.9700      | I7—Bi2—I8                                   | 88.71 (8)   |
| Bi1—I11 <sup>i</sup>    | 3.098 (3)  | C9—H9B                                      | 0.9700      | I7—Bi2—I5                                   | 90.73 (8)   |
| Bi1—I004 <sup>ii</sup>  | 3.103 (3)  | C9—C8                                       | 1.50 (6)    | I7—Bi2—I3 <sup>v</sup>                      | 177.95 (9)  |
| Bi1—I004 <sup>iii</sup> | 3.103 (3)  | N5—H5A                                      | 0.8900      | I7—Bi2—I2 <sup>vi</sup>                     | 90.07 (8)   |
| Bi1—I10                 | 3.044 (3)  | N5—H5B                                      | 0.8900      | I5—Bi2—I8                                   | 179.16 (9)  |
| Bi1—I10 <sup>i</sup>    | 3.044 (3)  | N5—H5C                                      | 0.8900      | I3 <sup>v</sup> —Bi2—I8                     | 90.54 (8)   |
| Bi2—I006 <sup>iv</sup>  | 3.068 (3)  | N5—C7                                       | 1.48 (4)    | I3 <sup>v</sup> —Bi2—I5                     | 90.04 (8)   |
| Bi2—I7                  | 3.046 (3)  | C8—H8A                                      | 0.9700      | I3 <sup>v</sup> —Bi2—I2 <sup>vi</sup>       | 88.02 (9)   |
| Bi2—I8                  | 3.097 (3)  | C8—H8B                                      | 0.9700      | I2 <sup>vi</sup> —Bi2—I8                    | 88.96 (8)   |
| Bi2—I5                  | 3.095 (3)  | C8—C7                                       | 1.53 (6)    | I2 <sup>vi</sup> —Bi2—I5                    | 91.67 (8)   |
| Bi2—I3 <sup>v</sup>     | 3.084 (3)  | C2—H2D                                      | 0.9700      | Cu2—I10—Bi1                                 | 169.68 (10) |
| Bi2—I2 <sup>vi</sup>    | 3.090 (3)  | C2—H2E                                      | 0.9700      | Cu1—I3—Bi2 <sup>iii</sup>                   | 166.22 (13) |
| I9—Cu2                  | 2.532 (5)  | C16—H16A                                    | 0.9700      | Cu1—I2—Bi2 <sup>vii</sup>                   | 172.29 (13) |
| I10—Cu2                 | 2.981 (10) | C16—H16B                                    | 0.9700      | I9 <sup>viii</sup> —Cu2—I9                  | 139.9 (6)   |
| I4—Cu1                  | 2.486 (5)  | C5—H5D                                      | 0.9700      | I9—Cu2—I10                                  | 108.46 (18) |
| I1—Cu1                  | 2.495 (5)  | C5—H5E                                      | 0.9700      | I9—Cu2—I10 <sup>viii</sup>                  | 100.78 (17) |
| I3—Cu1                  | 2.964 (6)  | C5—C4                                       | 1.54 (4)    | I9 <sup>viii</sup> —Cu2—I10 <sup>viii</sup> | 108.46 (18) |
| I2—Cu1                  | 2.936 (6)  | N3—H3                                       | 0.9800      | I9 <sup>viii</sup> —Cu2—I10                 | 100.78 (17) |
| N6—H6                   | 0.9800     | N3—C6                                       | 1.45 (4)    | I10—Cu2—I10 <sup>viii</sup>                 | 85.5 (4)    |
| N6—C10                  | 1.52 (4)   | N3—C4                                       | 1.50 (4)    | I4—Cu1—I1                                   | 144.1 (3)   |
| N6—C12                  | 1.50 (4)   | C18—H18A                                    | 0.9600      | I4—Cu1—I3                                   | 96.70 (16)  |
| N6—C9                   | 1.56 (5)   | C18—H18B                                    | 0.9600      | I4—Cu1—I2                                   | 105.25 (16) |
| N2—H2A                  | 0.8900     | C18—H18C                                    | 0.9600      | I1—Cu1—I3                                   | 108.50 (17) |
| N2—H2B                  | 0.8900     | C7—H7                                       | 0.9800      | I1—Cu1—I2                                   | 99.43 (16)  |
| N2—H2C                  | 0.8900     | C6—H6A                                      | 0.9600      | I2—Cu1—I3                                   | 91.23 (19)  |
| N2—C14                  | 1.62 (5)   | C6—H6B                                      | 0.9600      | C13—N1—C18                                  | 113 (3)     |
| C15—H15A                | 0.9700     | C11—H11A                                    | 0.9700      | C16—N1—H1                                   | 107.5       |
| C15—H15B                | 0.9700     | C11—H11B                                    | 0.9700      | C18—N1—H1                                   | 107.5       |
| C15—C14                 | 1.49 (6)   | C11—C7                                      | 1.47 (5)    | C18—N1—C16                                  | 108 (3)     |
| C15—C16                 | 1.43 (6)   | C1—H1A                                      | 0.9800      | N6—C12—H12A                                 | 109.5       |
| C14—H14                 | 0.9800     | C1—C2                                       | 1.52 (5)    | N6—C12—H12B                                 | 109.5       |
| C14—C17                 | 1.42 (6)   | C1—C5                                       | 1.44 (4)    | N6—C12—H12C                                 | 109.5       |
| C10—H10A                | 0.9700     | C6—H6C                                      | 0.9600      | H12A—C12—H12B                               | 109.5       |
| C10—H10B                | 0.9700     | C4—H4A                                      | 0.9700      | H12A—C12—H12C                               | 109.5       |
| C10—C11                 | 1.52 (4)   | C4—H4B                                      | 0.9700      | H12B—C12—H12C                               | 109.5       |
| C13—H13A                | 0.9700     | N4—H4C                                      | 0.8900      | H3A—C3—H3B                                  | 107.1       |
| C13—H13B                | 0.9700     | N4—H4D                                      | 0.8900      | C2—C3—H3A                                   | 107.7       |
| C13—N1                  | 1.46 (5)   | N4—H4E                                      | 0.8900      | C2—C3—H3B                                   | 107.7       |
| C13—C17                 | 1.54 (5)   | I11—Bi1—I11 <sup>i</sup>                    | 179.25 (10) | C2—C3—N3                                    | 118 (4)     |
| C1—N4                   | 1.48 (6)   | I11 <sup>i</sup> —Bi1—I004 <sup>ii</sup>    | 90.55 (7)   | N3—C3—H3A                                   | 107.7       |
| N1—H1                   | 0.9800     | I11—Bi1—I004 <sup>ii</sup>                  | 89.99 (7)   | N3—C3—H3B                                   | 107.7       |
| N1—C16                  | 1.54 (6)   | I11—Bi1—I004 <sup>iii</sup>                 | 90.55 (7)   | C14—C17—C13                                 | 103 (3)     |
| N1—C18                  | 1.50 (4)   | I11 <sup>i</sup> —Bi1—I004 <sup>iii</sup>   | 89.99 (7)   | C14—C17—H17A                                | 111.1       |
| C12—H12A                | 0.9600     | I004 <sup>iii</sup> —Bi1—I004 <sup>ii</sup> | 86.67 (11)  | C14—C17—H17B                                | 111.1       |
| C12—H12B                | 0.9600     | I10—Bi1—I11                                 | 88.17 (7)   | C13—C17—H17A                                | 111.1       |
| C12—H12C                | 0.9600     | I10—Bi1—I11 <sup>i</sup>                    | 91.32 (7)   | H17A—C17—H17B                               | 109.1       |
| C3—H3A                  | 0.9700     | I10 <sup>i</sup> —Bi1—I11 <sup>i</sup>      | 88.17 (7)   | N6—C9—H9A                                   | 109.5       |
| C3—H3B                  | 0.9700     | I10 <sup>i</sup> —Bi1—I11                   | 91.32 (7)   | N6—C9—H9B                                   | 109.5       |
| C3—C2                   | 1.44 (6)   | I006 <sup>iv</sup> —Bi2—I5                  | 87.98 (8)   | H9A—C9—H9B                                  | 108.1       |
| C3—N3                   | 1.59 (5)   | I006 <sup>iv</sup> —Bi2—I3 <sup>v</sup>     | 90.01 (8)   | C8—C9—N6                                    | 111 (3)     |
| C17—H17A                | 0.9700     | I006 <sup>iv</sup> —Bi2—I2 <sup>vi</sup>    | 178.00 (9)  | C8—C9—H9A                                   | 109.5       |
| C17—H17B                | 0.9700     | I7—Bi2—I006 <sup>iv</sup>                   | 91.91 (9)   | H17A—C17—H17B                               | 109.1       |



| Bonds         | Length<br>/Å | Bonds         | Length<br>/Å | Bonds         | Length<br>/Å |
|---------------|--------------|---------------|--------------|---------------|--------------|
| C8—C9—H9B     | 109.5        | C11—C10—H10A  | 109.7        | H18A—C18—H18C | 109.5        |
| H5A—N5—H5B    | 109.5        | C11—C10—H10B  | 109.7        | H18B—C18—H18C | 109.5        |
| H5A—N5—H5C    | 109.5        | H13A—C13—H13B | 108.2        | C11—C7—N5     | 115 (3)      |
| H5B—N5—H5C    | 109.5        | N1—C13—H13A   | 109.8        | C11—C7—C8     | 109 (3)      |
| C7—N5—H5A     | 109.5        | N1—C13—H13B   | 109.8        | C11—C7—H7     | 107.9        |
| C7—N5—H5B     | 109.5        | N1—C13—C17    | 109 (3)      | N5—C7—C8      | 109 (3)      |
| C7—N5—H5C     | 109.5        | C17—C13—H13A  | 109.8        | N5—C7—H7      | 107.9        |
| C9—C8—H8A     | 108.9        | C17—C13—H13B  | 109.8        | C8—C7—H7      | 107.9        |
| C9—C8—H8B     | 108.9        | C10—C11—H11A  | 109.3        | N3—C6—H6A     | 109.5        |
| C9—C8—C7      | 113 (4)      | C10—C11—H11B  | 109.3        | N3—C6—H6B     | 109.5        |
| H8A—C8—H8B    | 107.7        | H11A—C11—H11B | 107.9        | N3—C6—H6C     | 109.5        |
| C7—C8—H8A     | 108.9        | C7—C11—C10    | 112 (3)      | H6A—C6—H6B    | 109.5        |
| C7—C8—H8B     | 108.9        | C7—C11—H11A   | 109.3        | H6A—C6—H6C    | 109.5        |
| C1—C2—H2D     | 109.6        | C7—C11—H11B   | 109.3        | H6B—C6—H6C    | 109.5        |
| C1—C2—H2E     | 109.6        | C2—C1—H1A     | 107.3        | C5—C4—H4A     | 109.3        |
| C3—C2—C1      | 110 (4)      | C5—C1—H1A     | 107.3        | C5—C4—H4B     | 109.3        |
| C3—C2—H2D     | 109.6        | C5—C1—C2      | 111 (3)      | N3—C4—C5      | 112 (2)      |
| C3—C2—H2E     | 109.6        | C5—C1—N4      | 115 (4)      | N3—C4—H4A     | 109.3        |
| C10—N6—H6     | 107.0        | N4—C1—H1A     | 107.3        | N3—C4—H4B     | 109.3        |
| C10—N6—C9     | 109 (3)      | N4—C1—C2      | 109 (3)      | H4A—C4—H4B    | 107.9        |
| C12—N6—H6     | 107.0        | C13—N1—H1     | 107.5        | C1—N4—H4C     | 109.5        |
| C12—N6—C10    | 113 (3)      | C13—N1—C16    | 114 (3)      | C1—N4—H4D     | 109.5        |
| C12—N6—C9     | 114 (3)      | N6—C10—C11—C7 | 63 (3)       | C1—N4—H4E     | 109.5        |
| C9—N6—H6      | 107.0        | H2D—C2—H2E    | 108.1        | H4C—N4—H4D    | 109.5        |
| H2A—N2—H2B    | 109.5        | C15—C16—N1    | 112 (3)      | H4C—N4—H4E    | 109.5        |
| H2A—N2—H2C    | 109.5        | C15—C16—H16A  | 109.3        | H4D—N4—H4E    | 109.5        |
| H2B—N2—H2C    | 109.5        | C15—C16—H16B  | 109.3        |               |              |
| C14—N2—H2A    | 109.5        | N1—C16—H16A   | 109.3        |               |              |
| C14—N2—H2B    | 109.5        | N1—C16—H16B   | 109.3        |               |              |
| C14—N2—H2C    | 109.5        | H16A—C16—H16B | 108.0        |               |              |
| H15A—C15—H15B | 108.2        | C1—C5—H5D     | 109.3        |               |              |
| C14—C15—H15A  | 109.8        | C1—C5—H5E     | 109.3        |               |              |
| C14—C15—H15B  | 109.8        | C1—C5—C4      | 112 (3)      |               |              |
| C16—C15—H15A  | 109.8        | H5D—C5—H5E    | 107.9        |               |              |
| C16—C15—H15B  | 109.8        | C4—C5—H5D     | 109.3        |               |              |
| C16—C15—C14   | 109 (4)      | C4—C5—H5E     | 109.3        |               |              |
| N2—C14—H14    | 107.3        | C3—N3—H3      | 108.1        |               |              |
| C15—C14—N2    | 106 (4)      | C6—N3—C3      | 115 (3)      |               |              |
| C15—C14—H14   | 107.3        | C6—N3—H3      | 108.1        |               |              |
| C17—C14—N2    | 107 (4)      | C6—N3—C4      | 111 (3)      |               |              |
| C17—C14—C15   | 122 (4)      | C4—N3—C3      | 106 (2)      |               |              |
| C17—C14—H14   | 107.3        | C4—N3—H3      | 108.1        |               |              |
| N6—C10—H10A   | 109.7        | N1—C18—H18A   | 109.5        |               |              |
| N6—C10—H10B   | 109.7        | N1—C18—H18B   | 109.5        |               |              |
| N6—C10—C11    | 110 (3)      | N1—C18—H18C   | 109.5        |               |              |
| H10A—C10—H10B | 108.2        | H18A—C18—H18B | 109.5        |               |              |

**Symmetry codes:** (i)  $-x+1, y, -z+1$ ; (ii)  $-x+1, y+1, -z$ ; (iii)  $x, y+1, z+1$ ; (iv)  $x, y, z-1$ ; (v)  $x, y-1, z-1$ ; (vi)  $x, y-1, z$ ; (vii)  $x, y, z+1$ ; (viii)  $x, y+1, z$ ; (ix)  $-x+1, y, -z$ .

**Table S3.** Bond lengths (di) and bond distortions ( $\Delta d$ ) for **(H<sub>2</sub>MPP)<sub>2</sub>BiCuI<sub>8</sub>** compound.

| (H <sub>2</sub> MPP) <sub>2</sub> BiCuI <sub>8</sub> |             |                              |                        |                        |                       |                        |                       |
|------------------------------------------------------|-------------|------------------------------|------------------------|------------------------|-----------------------|------------------------|-----------------------|
| [BiI <sub>6</sub> ]<br>Octahedral                    | d=3.079Å    | Individual bond lengths (di) |                        |                        |                       |                        |                       |
|                                                      |             | 3.045 Å                      | 3.096 Å                | 3.067 Å                | 3.084 Å               | 3.094 Å                | 3.090 Å               |
| Bond length Distortion (Δd)                          |             | 1.2 × 10 <sup>-4</sup>       | 3.0 × 10 <sup>-5</sup> | 1.0 × 10 <sup>-4</sup> | 2.63×10 <sup>-6</sup> | 2.0×10 <sup>-5</sup>   | 1.0×10 <sup>-5</sup>  |
| [CuI <sub>6</sub> ]<br>Octahedral                    | d = 3.029 Å | 3.096 Å                      | 2.486 Å                | 2.935 Å                | 2.494 Å               | 4.229 Å                | 2.934 Å               |
|                                                      |             | 1.5 × 10 <sup>-2</sup>       | 9.3× 10 <sup>-3</sup>  | 4.4× 10 <sup>-3</sup>  | 8.7×10 <sup>-3</sup>  | 8.92× 10 <sup>-2</sup> | 4.4× 10 <sup>-3</sup> |

**Table S4.** Potential hydrogen bonding data of compound (H<sub>2</sub>MPP)<sub>2</sub>BiCuI<sub>8</sub>

| D-H      | d(D-H) | d(H..A) | <DHA   | d(D..A) | A                         |
|----------|--------|---------|--------|---------|---------------------------|
| N6-H6    | 0.98   | 2.506   | 175.93 | 3.484   | I9                        |
| N2-H2A   | 0.89   | 2.728   | 160.17 | 3.578   | I4                        |
| N2-H2B   | 0.89   | 2.848   | 148.33 | 3.635   | I11 [ x, y-1, z]          |
| N2-H2C   | 0.89   | 2.979   | 148.22 | 3.765   | I10 [ x, y-1, z]          |
| N2-H2C   | 0.89   | 3.18    | 125.02 | 3.762   | I10 [ -x+1, y-1, -z]      |
| C14-H14  | 0.98   | 3.104   | 161.98 | 4.047   | I11 [ x, y-1, z-1]        |
| C10-H10A | 0.97   | 3.092   | 141.32 | 3.896   | I11 [ x, y-1, z]          |
| C13-H13A | 0.97   | 3.136   | 157.2  | 4.048   | I8                        |
| C1-H1A   | 0.98   | 2.476   | 178.57 | 3.455   | I1                        |
| N1-H1    | 0.98   | 2.516   | 177.77 | 3.495   | I4                        |
| C12-H12B | 0.96   | 3.153   | 132.06 | 3.863   | I10 [ -x+1, y, -z+1]      |
| C17-H17A | 0.97   | 3.294   | 146.34 | 4.137   | I9 [ x, y-1, z]           |
| C9-H9A   | 0.97   | 3.134   | 150.42 | 4.006   | I11                       |
| N5-H5A   | 0.89   | 2.949   | 148.63 | 3.738   | I6 [ x, y+1, z]           |
| N5-H5A   | 0.89   | 3.167   | 127.22 | 3.773   | I7 [ x, y+1, z]           |
| N5-H5B   | 0.89   | 2.76    | 178.68 | 3.65    | I8 [ x, y+1, z]           |
| N5-H5C   | 0.89   | 2.863   | 136.48 | 3.561   | I3                        |
| N5-H5C   | 0.89   | 3.039   | 121.58 | 3.586   | I2                        |
| C8-H8A   | 0.97   | 3.256   | 147.25 | 4.106   | I4 [ x, y+1, z]           |
| C2-H2D   | 0.97   | 3.029   | 146.22 | 3.873   | I5 [ x, y+1, z+1]         |
| C16-H16A | 0.97   | 3.114   | 134.08 | 3.852   | I8 [ x, y+1, z]           |
| C5-H5D   | 0.97   | 3.187   | 145.54 | 4.024   | I5 [ x, y, z+1]           |
| N3-H3    | 0.98   | 3.145   | 158.43 | 4.072   | I5 [ -x+3/2, y+1/2, -z+1] |
| C18-H18C | 0.96   | 3.31    | 171.71 | 4.262   | I4 [ x, y, z-1]           |
| C7-H7    | 0.98   | 3.149   | 162.74 | 4.095   | I8 [ x, y+1, z+1]         |
| C6-H6A   | 0.96   | 2.703   | 165.96 | 3.642   | I5 [ -x+3/2, y+1/2, -z]   |
| C6-H6B   | 0.96   | 3.006   | 126.7  | 3.662   | I3 [ -x+3/2, y-1/2, -z+1] |
| C6-H6B   | 0.96   | 2.976   | 125.37 | 3.617   | I2 [ -x+3/2, y-1/2, -z+1] |
| C6-H6C   | 0.96   | 3.107   | 120.04 | 3.682   | I6 [ -x+3/2, y+1/2, -z]   |
| C6-H6C   | 0.96   | 2.814   | 150.91 | 3.683   | I7 [ -x+3/2, y+1/2, -z+1] |
| C4-H4A   | 0.97   | 3.284   | 156.78 | 4.193   | I1 [ -x+3/2, y-1/2, -z+1] |
| N4-H4C   | 0.89   | 3.263   | 147.87 | 4.045   | I3                        |
| N4-H4D   | 0.89   | 3.118   | 141.14 | 3.852   | I2 [ x, y, z+1]           |
| N4-H4E   | 0.89   | 3.216   | 162.44 | 4.074   | I7 [ x, y, z+1]           |

**Table S5.** Stability tests and band gap comparison of **(H<sub>2</sub>MPP)<sub>2</sub>BiCuI<sub>8</sub>** with other reported lead-free halide perovskite materials.

| Compounds                                                                                             | Stability<br>Test period<br>(days) | Test<br>condition | Band<br>gap (eV) | Ref.                 |
|-------------------------------------------------------------------------------------------------------|------------------------------------|-------------------|------------------|----------------------|
| [(3AMPY) <sub>2</sub> AgBiI <sub>8</sub> ·H <sub>2</sub> O]                                           | 30                                 | 55% RH            | 1.86             | [S6]                 |
| (DPA) <sub>4</sub> AgBiBr <sub>8</sub>                                                                | -                                  | -                 | 2.44             | [S7]                 |
| (C <sub>6</sub> H <sub>16</sub> N <sub>2</sub> ) <sub>2</sub> AgBiI <sub>8</sub> ·H <sub>2</sub> O    | 30                                 | 55% RH            | 1.93             | [S8]                 |
| (C <sub>6</sub> H <sub>16</sub> N <sub>2</sub> ) <sub>2</sub> CuBiI <sub>8</sub> ·0.5H <sub>2</sub> O | 30                                 | 55% RH            | 1.68             | [S8]                 |
| (C <sub>6</sub> H <sub>16</sub> N <sub>2</sub> ) <sub>2</sub> BiAgI <sub>8</sub> ·H <sub>2</sub> O    | 30                                 | 55% RH            | 2                | [S9]                 |
| (NH <sub>3</sub> C <sub>5</sub> H <sub>9</sub> ) <sub>4</sub> AgSbI <sub>8</sub>                      | 60                                 | 55% RH            | 2.37             | [S10]                |
| (NH <sub>3</sub> C <sub>8</sub> H <sub>15</sub> ) <sub>4</sub> AgSbI <sub>8</sub>                     | 60                                 | 55% RH            | 2.44             | [S10]                |
| (NH <sub>3</sub> C <sub>6</sub> H <sub>11</sub> ) <sub>4</sub> AgSbI <sub>8</sub>                     | 60                                 | 55% RH            | 2.39             | [S10]                |
| <b>(H<sub>2</sub>MPP)<sub>2</sub>BiCuI<sub>8</sub></b>                                                | <b>90</b>                          | <b>55% RH</b>     | <b>1.65</b>      | <b>This<br/>work</b> |

3AMPY = 3-(aminomethyl) pyridinium)/ DPA = 2,2-dimethylpropan-1-aminium/ H<sub>2</sub>MPP = 1-methylpiperidinium-4-amine

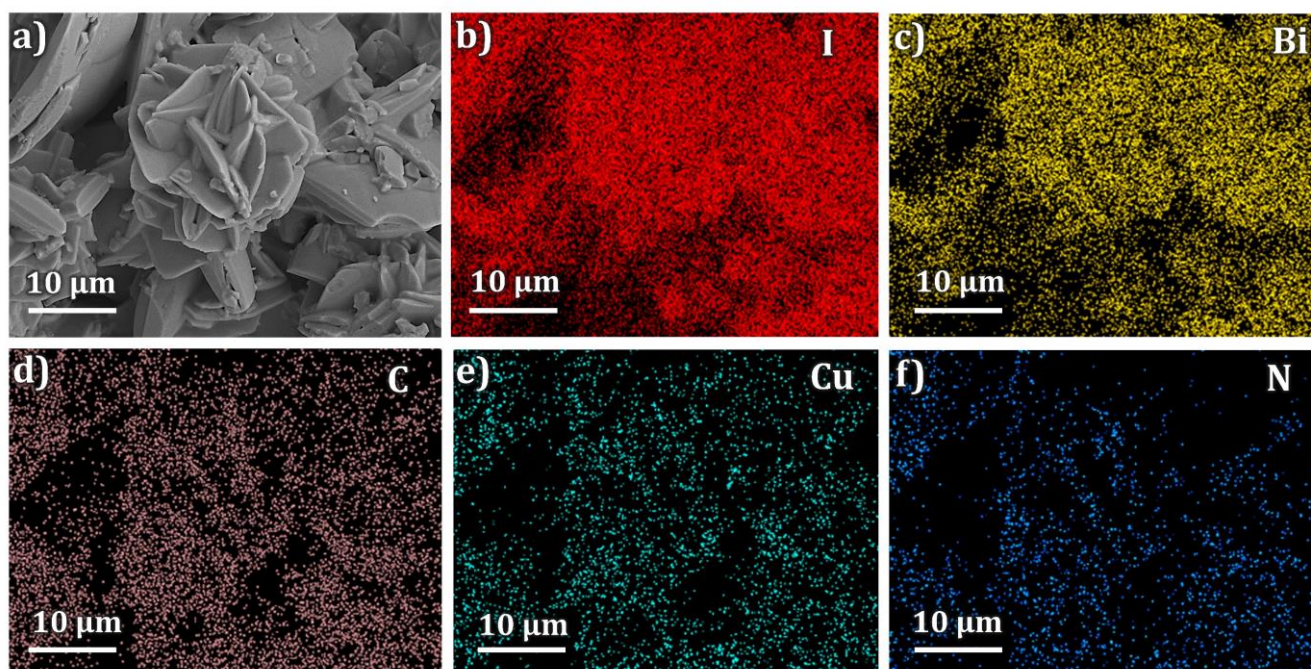

**Figure S1.** (a)  $(\text{H}_2\text{MPP})_2\text{BiCuI}_8$  sample SEM and (b-f) elemental mapping of I, Bi, C, Cu and N for a single crystal

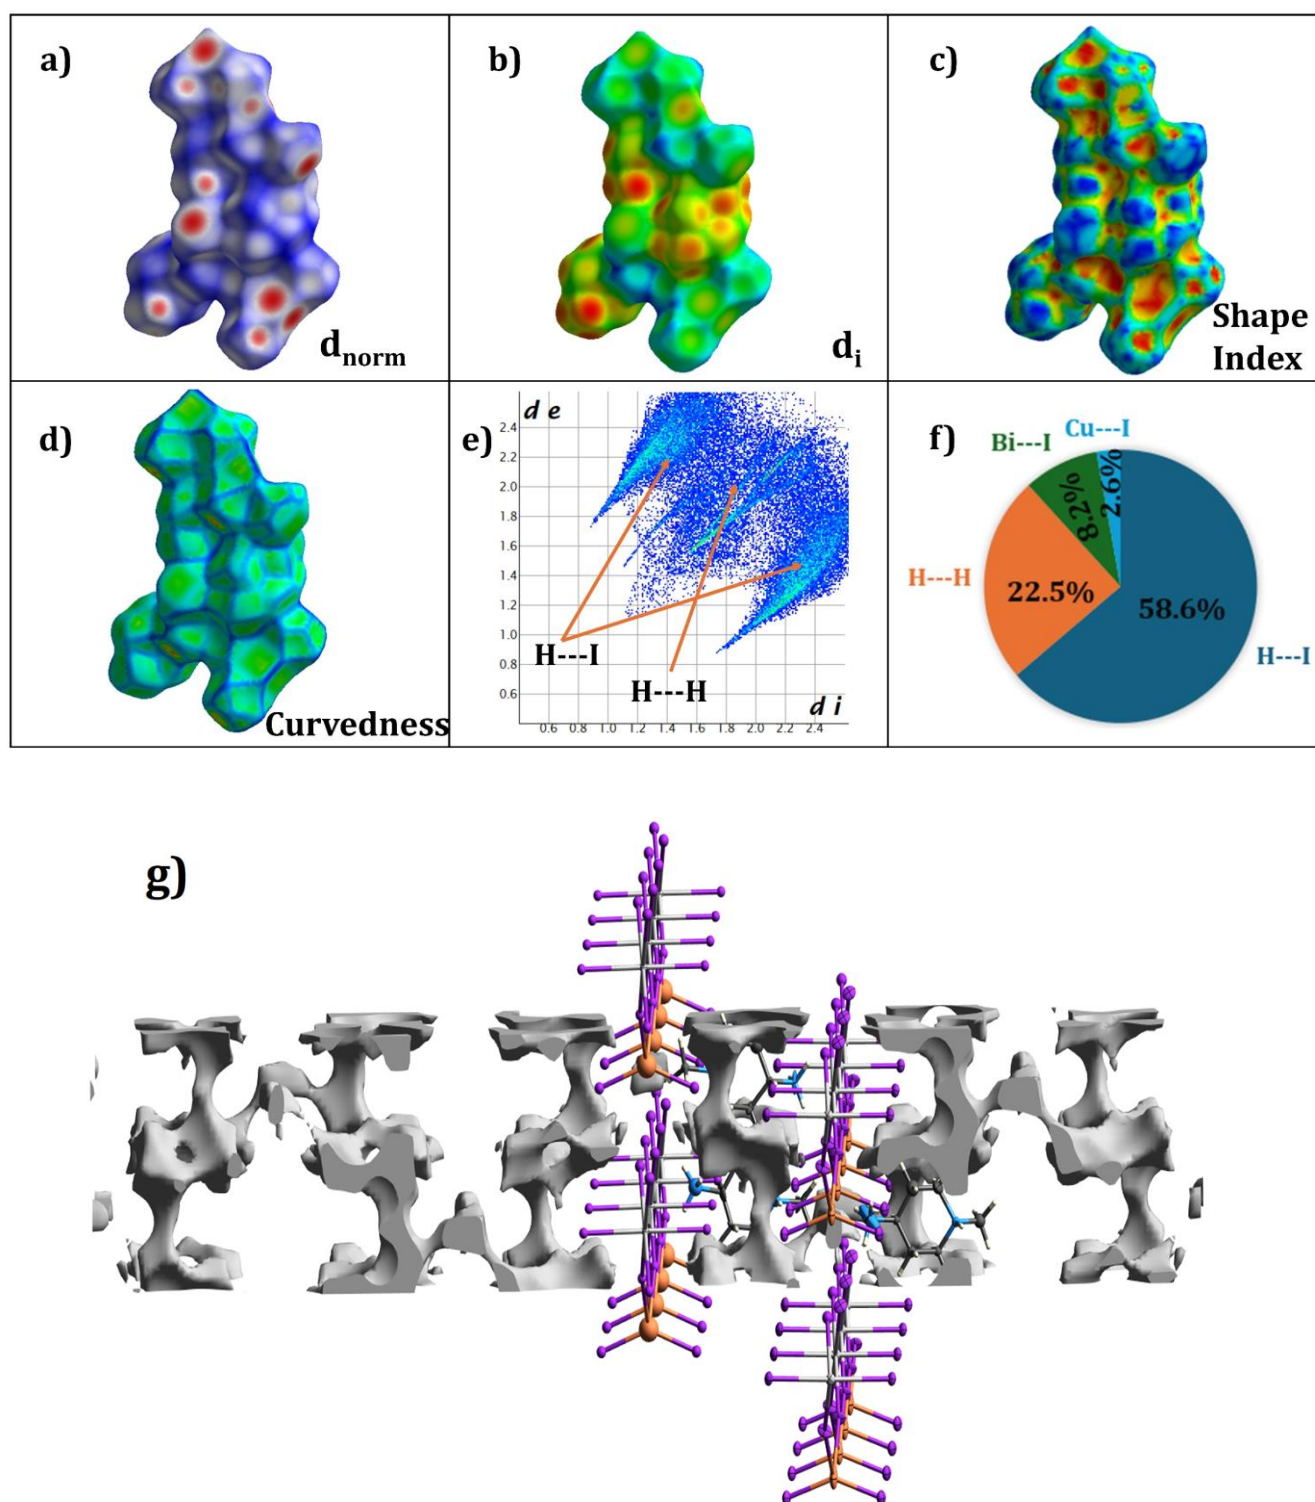

**Figure S2.** (a-d) Hirshfeld surfaces mapped with  $d_{\text{norm}}$  (a),  $d_i$  (b), Shape index (c) and curvedness (d) for  $(\text{H}_2\text{MPP})_2\text{BiCuI}_8$ ; (e) two-dimensional finger prints plots for  $(\text{H}_2\text{MPP})_2\text{BiCuI}_8$ ; (f) Interatomic and intra-atomic interactions for  $(\text{H}_2\text{MPP})_2\text{BiCuI}_8$ ; (g) voids analysis for  $(\text{H}_2\text{MPP})_2\text{BiCuI}_8$

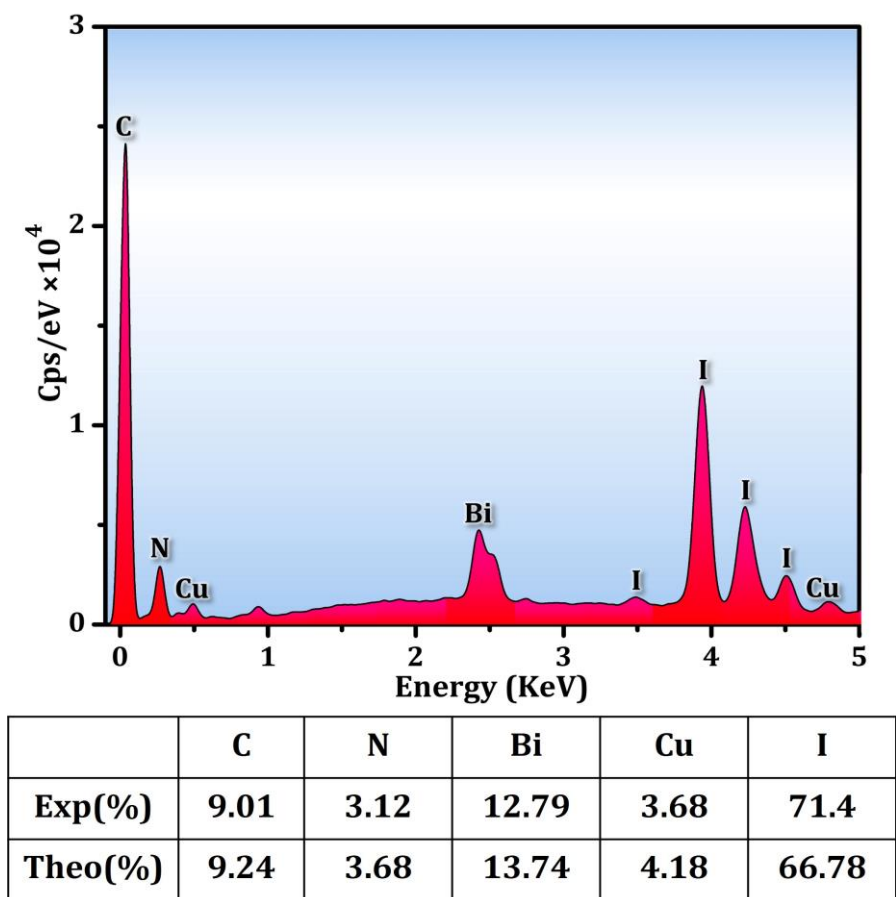

**Figure S3.** Elemental analysis result for C, N, Bi, Cu and I in  $(\text{H}_2\text{MPP})_2\text{BiCuI}_8$

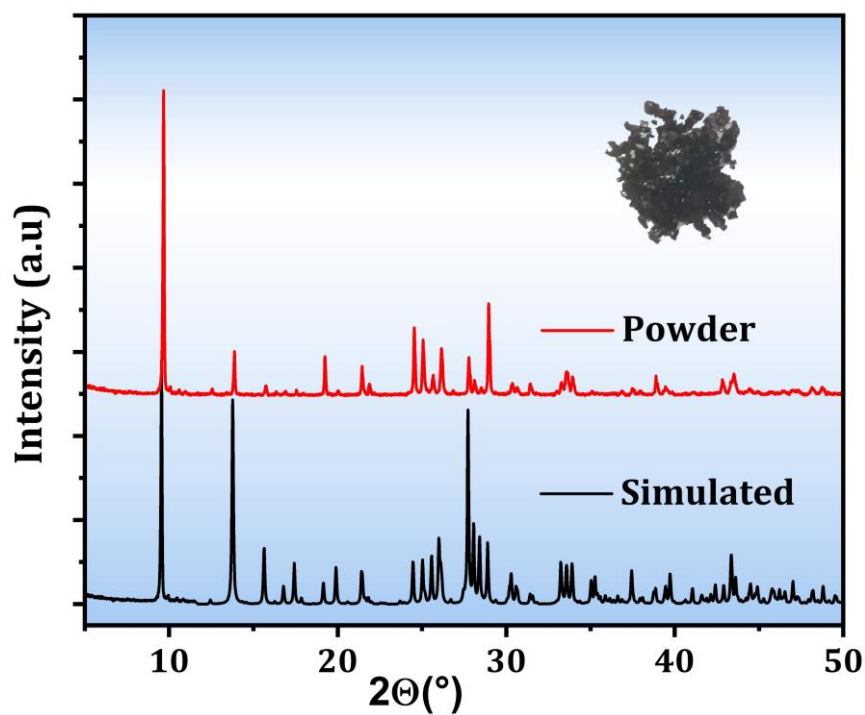

**Figure S4.** The experimental PXRD pattern of  $(\text{H}_2\text{MPP})_2\text{BiCuI}_8$  in comparison to its simulation pattern



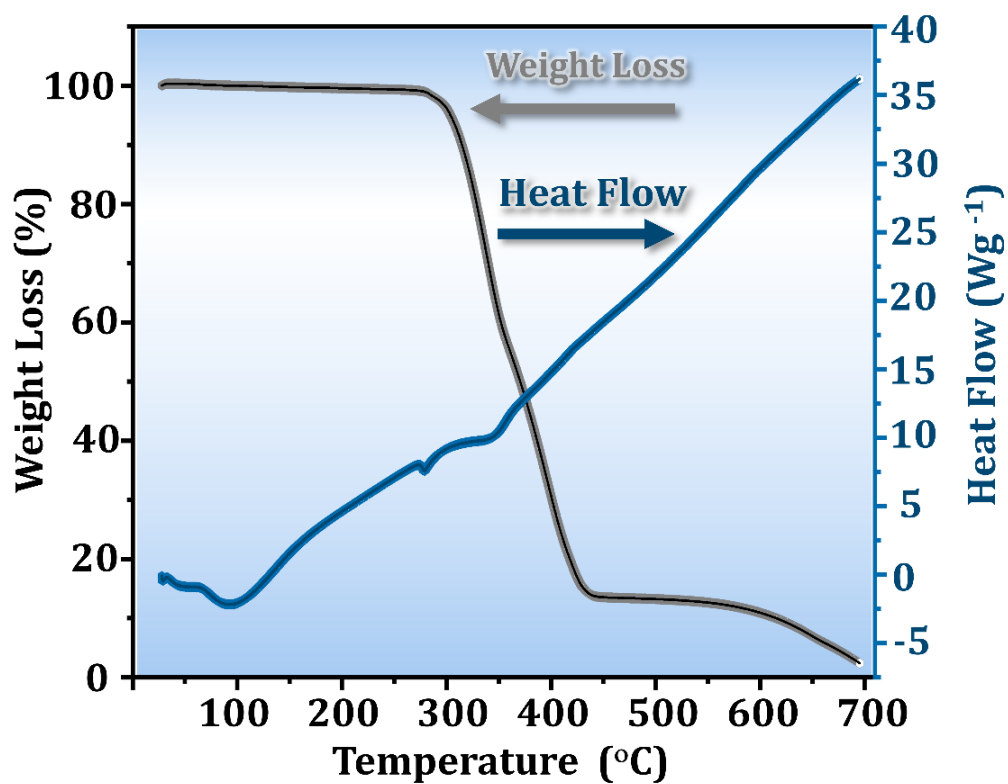

Figure S5. TGA curves of  $(\text{H}_2\text{MPP})_2\text{BiCuI}_8$

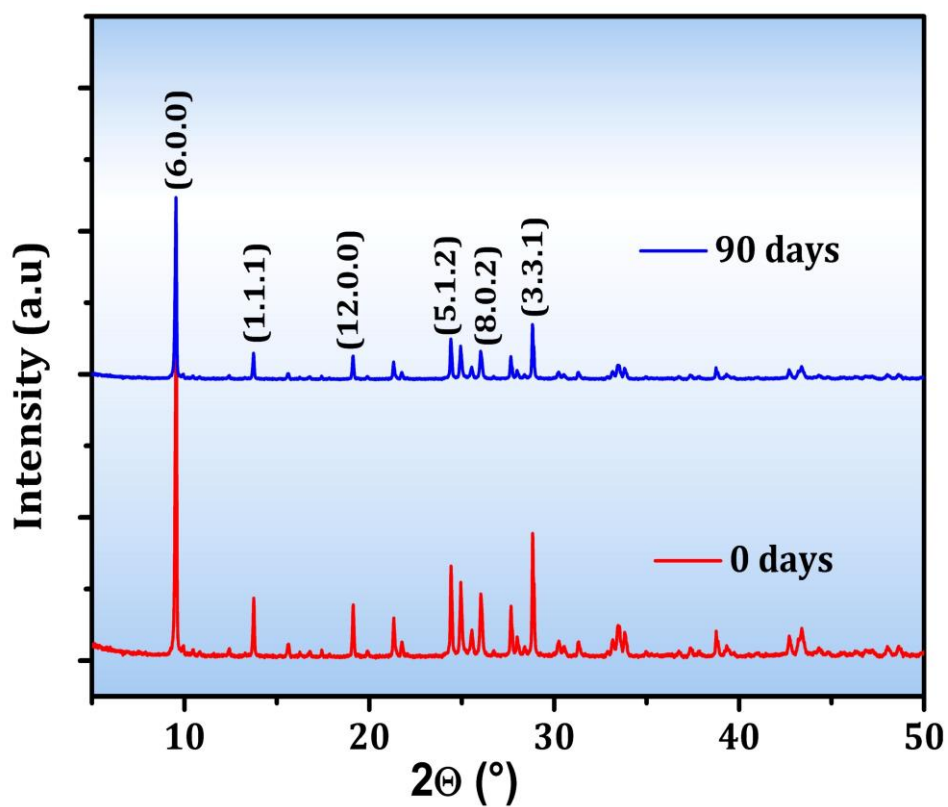

Figure S6. XRD patterns of  $(\text{H}_2\text{MPP})_2\text{BiCuI}_8$  powder before and after exposure to humidity (55% RH) for 90 days



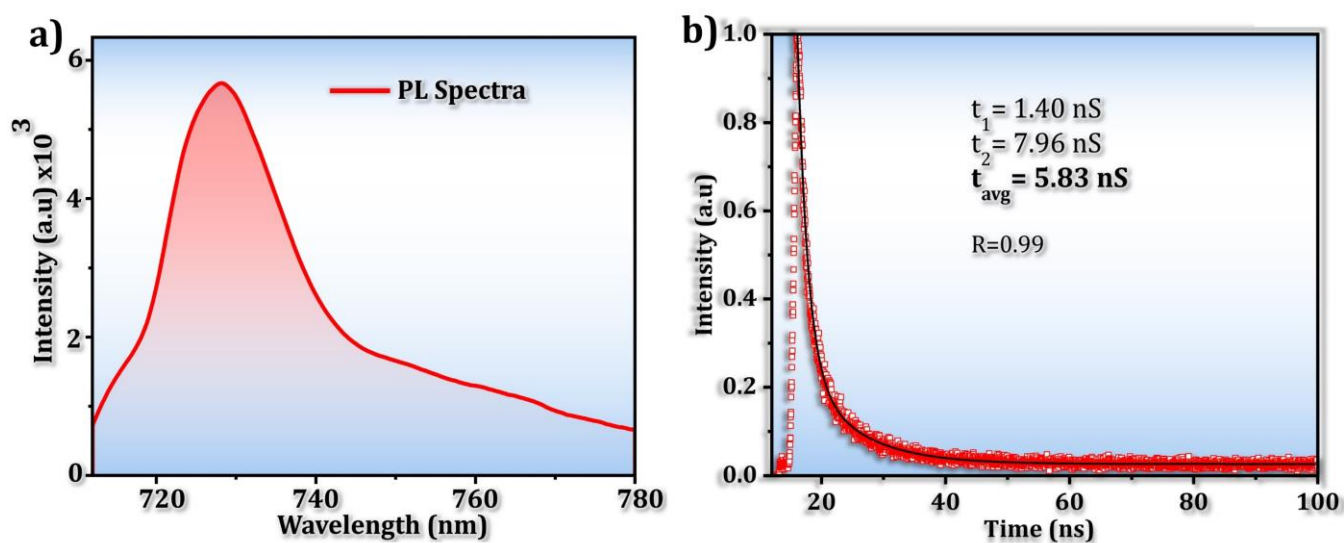

**Figure S7.** (a) The steady-state room-temperature photoluminescence (PL) spectra of  $(\text{H}_2\text{MPP})_2\text{BiCuI}_8$ . (b) Time-resolved PL decay profile of  $(\text{H}_2\text{MPP})_2\text{BiCuI}_8$  fitted with a bi-exponential model

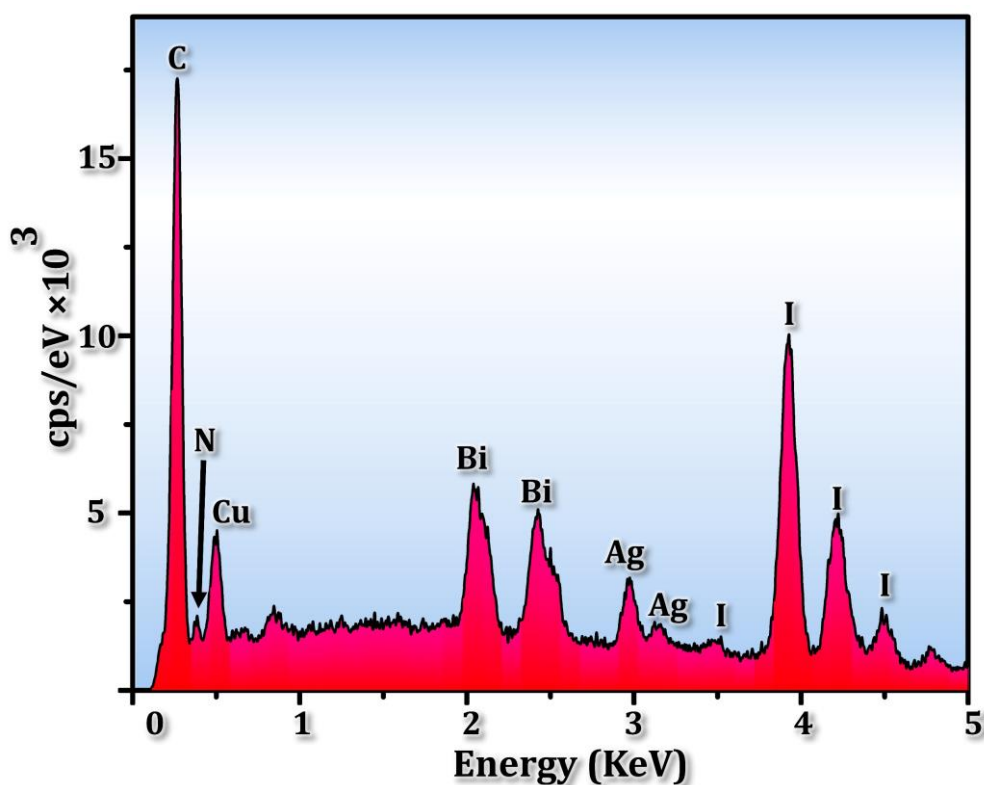

**Figure S8.** Elemental analysis result for C, N, Bi, Cu and I in  $\text{Ag}/(\text{H}_2\text{MPP})_2\text{BiCuI}_8/\text{ITO}$

## References

- [S1] G. M. Sheldrick, *Acta Crystallogr A* **2008**, 64, 112-122.
- [S2] J. Hafner, *Journal of Computational Chemistry* **2008**, 29, 2044-2078.
- [S3] J. P. Perdew, K. Burke, M. Ernzerhof, *Physical Review Letters* **1996**, 77, 3865-3868.
- [S4] D. M. Ceperley, B. J. Alder, *Physical Review Letters* **1980**, 45, 566-569.
- [S5] J. P. Perdew, A. Zunger, *Physical Review B* **1981**, 23, 5048-5079.
- [S6] D. Fu, S. Wu, Y. Liu, Y. Yao, Y. Hea and X-M. Zhang, *Inorg. Chem. Front.*, 2021,8, 3576-3580.
- [S7] C-Y. Su, Y-F. Yao, Z-X. Zhang, Y. Wang, M. Chen, P-Z. Huang, Y. Zhang, W-C. Qiao and D-W. Fu, *Chem. Sci.* , 2022,13, 4794-4800.
- [S8] L-Y. Bi, Y-Q. Hu, M-Q. Li, T-L. Hu, H-L. Zhang, X-T. Yin, W-X. Que, M. S. Lassoued and Y-Z. Zheng, *J. Mater. Chem. A*. 2019, 7, 19662-19667.
- [S9] M. S. Lassoued, L.-Y. Bi, Z. Wu, G. Zhou and Y.-Z. Zheng, *J. Mater. Chem. C*. 2020, 8, 5349–5354.
- [S10] Q.-W. Li, M. S. Lassoued, W.-P. Chen, G.-Y. Gou and Y.-Z. Zheng, *ACS Appl. Mater. Interfaces*, 2024, 16, 5769-5778.
